# Supplementary material
Source: Copernicus journal article supplement (doi:10.5194/acp-26-6391-2026)
Supplement: Supplementary file 1 [file acp-26-6391-2026-supplement.pdf]

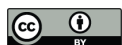

*Supplement of*

## **Late autumn aerosol trace element composition and source tracking over the southern Mozambique Channel**

**Morgane M. G. Perron et al.**

*Correspondence to:* Morgane M. G. Perron ([morgane.perron@univ-brest.fr](mailto:morgane.perron@univ-brest.fr))

The copyright of individual parts of the supplement might differ from the article licence.

**Table S1. Sampling periods for all aerosol filters (A1-A10) collected during the RESILIENCE campaign in April-May 2022 together with the associated ship's coordinate and volume of air sampled through each 47mm filter. HYSPLIT meteorological data on precipitation pattern (rainfall) along individual sample's prevailing air-mass trajectory is also given in millimetres of rain per 24h sampling period.**

| Sample ID | Start Date /Time (UTC) | Lat (° S) | Long (° E) | End Date /Time (UTC) | Lat (° S) | Long (° E) | Volume air (m <sup>3</sup> ) |
|-----------|------------------------|-----------|------------|----------------------|-----------|------------|------------------------------|
| A1        | 22.04.2022 07:45       | 24.335    | 49.772     | 23.04.2022 07:45     | 26.231    | 44.133     | 130                          |
| A2        | 23.04.2022 09 :30      | 26.049    | 43.760     | 24.04.2022 09:30     | 24.554    | 41.019     | 130                          |
| A3        | 24.04.2022 11 :15      | 24.208    | 40.926     | 25.04.2022 04:30     | 21.731    | 39.542     | 92                           |
| A4        | 26.04.2022 07 :40      | 21.234    | 38.925     | 27.04.2022 05:40     | 21.530    | 38.753     | 119                          |
| A5        | 27.04.2022 05 :50      | 21.530    | 38.757     | 28.04.2022 05:15     | 21.188    | 38.620     | 127                          |
| A6        | 28.04.2022 06:30       | 21.197    | 38.665     | 29.04.2022 06:00     | 21.668    | 38.766     | 127                          |
| A7        | 29.04.2022 06:00       | 21.668    | 38.766     | 30.04.2022 07:30     | 21.958    | 38.679     | 138                          |
| A8        | 30.04.2022 11:00       | 21.931    | 38.683     | 01.05.2022 06:00     | 23.027    | 37.396     | 103                          |
| A9        | 01.05.2022 07:00       | 23.221    | 37.283     | 02.05.2022 06:00     | 27.228    | 34.374     | 124                          |
| A10       | 02.05.2022 07:30       | 27.413    | 34.177     | 03.05.2022 05:00     | 30.055    | 30.997     | 116                          |

**Table S2. Absolute mass measured for ~10mg of reference material, either Arizona Test Dust (Powder Technologies Inc.: ISO 12103-1, A1 Ultrafine Test Dust, “ATD”, n=3) or BCR-414 (Bureau of Reference plankton certified reference material , “BCR”, n=3), as well as the reference values (ATD ref and BCR ref) and the average recovery obtained in this study for each trace element of interest (meanATD and meanBCR). Missing data are due to analytical failure (high instrumental relative standard deviation) during the analytical run.**

|                    | Al           | Cd             | Cr            | Cu            | Fe            | Ni            | Pb           | Ti            | V             | Zn            |
|--------------------|--------------|----------------|---------------|---------------|---------------|---------------|--------------|---------------|---------------|---------------|
| ATD ref            | 67573± 3853* | 0.4±0.1*       | 59±6*         | 49±9*         | 32922± 3425*  | 31±6*         | 35±4*        | 3299± 316*    | 72±6*         | 134±19*       |
| ATD-1              | 68653        | 0.5            | 67            | 52            | 37249         | 37            |              | 3590          | 83            | 148           |
| ATD-2              | 62854        | 0.5            | 54            | 42            | 30942         | 32            | 37           | 2985          | 67            | 126           |
| ATD-3              | 71994        |                | 64            | 49            | 36032         | 36            |              | 3506          | 78            | 142           |
| BCR ref            | 2406±180     | 0.4±0.01*      | 24±1*         | 29±1*         | 1850±190*     | 19±1*         | 4.0±0.2*     | 127±11        | 8±0.2*        | 112±2*        |
| BCR-1              | 2680         | 0.4            | 23            | 28            | 1956          | 18            | 4.3          | 135           | 9.0           | 107           |
| BCR-2 <sup>a</sup> | 2966         |                | 27            | 35            | 2333          | 22            |              | 154           | 11            | 139           |
| BCR-3              | 2824         | 0.4            | 24            | 28            | 2095          | 19            | 4.0          | 143           | 9.5           | 113           |
| <b>meanATD</b>     | <b>100±7</b> | <b>124±0.4</b> | <b>104±12</b> | <b>97±11</b>  | <b>106±10</b> | <b>113±10</b> | <b>105</b>   | <b>102±10</b> | <b>105±12</b> | <b>104±8</b>  |
| <b>meanBCR</b>     | <b>117±6</b> | <b>99±0.1</b>  | <b>102±8</b>  | <b>104±13</b> | <b>115±10</b> | <b>103±12</b> | <b>104±5</b> | <b>113±7</b>  | <b>120±12</b> | <b>107±15</b> |

Only values indicated with a “\*” symbol are consensus (ATD, Landing and Morton, pers. comm. March 2024) or certified (BCR).

Other values are indicative (ATD: Landing and Morton, pers. comm. May 2014; BCR: [https://georem.mpch-mainz.gwdg.de/sample\\_query.asp](https://georem.mpch-mainz.gwdg.de/sample_query.asp))

<sup>a</sup>BCR-2 sample mass likely underestimated due to unstable weighing conditions.

**Table S3. Average trace element content in procedural blank samples (n=2), expressed in nanograms (ng) per 47mm filter sample. Procedural blank contribution to the smallest sample mass (PB/SM<sub>min</sub>) measured is also displayed for indication together with the smallest quantifiable sample name (when other than A2).**

|                                      | <b>Cd</b> | <b>Pb</b> | <b>Al</b> | <b>Ti</b> | <b>V</b> | <b>Cr</b> | <b>Fe</b> | <b>Ni</b> | <b>Cu</b> | <b>Zn</b> |
|--------------------------------------|-----------|-----------|-----------|-----------|----------|-----------|-----------|-----------|-----------|-----------|
| <b>Average procedural blank (ng)</b> |           |           |           |           |          |           |           |           |           |           |
| Labile leach                         | 0.01      | 0.09      | 14.0      | 0.39      | 0.04     | 0.68      | 7.80      | 0.32      | 0.09      | 4.68      |
| Total sample                         | 0.07      | 0.16      | 162.0     | 100.3     | 0.30     | 6.68      | 58.7      | 1.07      | 1.18      | 25.8      |
| <b>PB/SM<sub>min</sub> (%)</b>       |           |           |           |           |          |           |           |           |           |           |
| Labile leach                         | 3         | 58 (A10)  | 44        | 59 (A3)   | 22 (A10) | 95 (A1)   | 17 (A10)  | 71        | 2 (A10)   | 32 (A10)  |
| Total sample                         | 12 (A9)   | 77 (A10)  | 39 (A7)   | 263 (A1)  | 69 (A4)  | 44 (A9)   | 58 (A5)   | 62 (A10)  | 23 (A10)  | 104 (A10) |

**Table S4. Fractional solubility of “major” (Al, Cr, Cu, Fe, Zn, and T) and “minor” (Cd, Ni, Pb, and V) trace elements measured in aerosol samples (A1-A10) collected over the southern Mozambique Channel expressed in percent (%). LQ indicates soluble fractions below the instrumental limit of quantification (defined as 10\*standard deviation analytical blank)**

|                                | A1   | A2   | A3   | A4   | A5 | A6   | A7   | A8   | A9   | A10 |
|--------------------------------|------|------|------|------|----|------|------|------|------|-----|
| <i>Major trace elements, %</i> |      |      |      |      |    |      |      |      |      |     |
| Al                             | 50   | 100* | 73   | 87   | 39 | 72   | 100* | 86   | 82   | 78  |
| Cr                             | 4    | 4    | 4    | 8    | 5  | 9    | 40   | 28   | 45   | 57  |
| Cu                             | 73   | 76   | 36   | 53   | 35 | 91   | 79   | 91   | 78   | 68  |
| Fe                             | 4    | LQ   | 21   | 38   | 37 | 16   | 48   | 30   | 21   | 35  |
| Ti                             | LQ   | LQ   | 0.2  | 5    | 6  | LQ   | LQ   | 0.7  | 0.2  | LQ  |
| Zn                             | 100* | 100* | 100* | 97   | 97 | 100* | 100* | 100* | 100* | 59  |
| <i>Minor trace elements, %</i> |      |      |      |      |    |      |      |      |      |     |
| Cd                             | 100* | 100* | 100* | 100* | 92 | 100* | 100* | 100* | 95   | 95  |
| Ni                             | 47   | 90   | 78   | 83   | 55 | 64   | 100* | 83   | 77   | 60  |
| Pb                             | 89   | 100* | 51   | 70   | 74 | 81   | 98   | 99   | 96   | 75  |
| V                              | 52   | LQ   | 23   | 80   | 50 | 40   | 100* | 59   | 64   | 47  |

\* Soluble trace metal concentrations for which the refractory metal fraction was below blank value (resulting in 100% solubility).

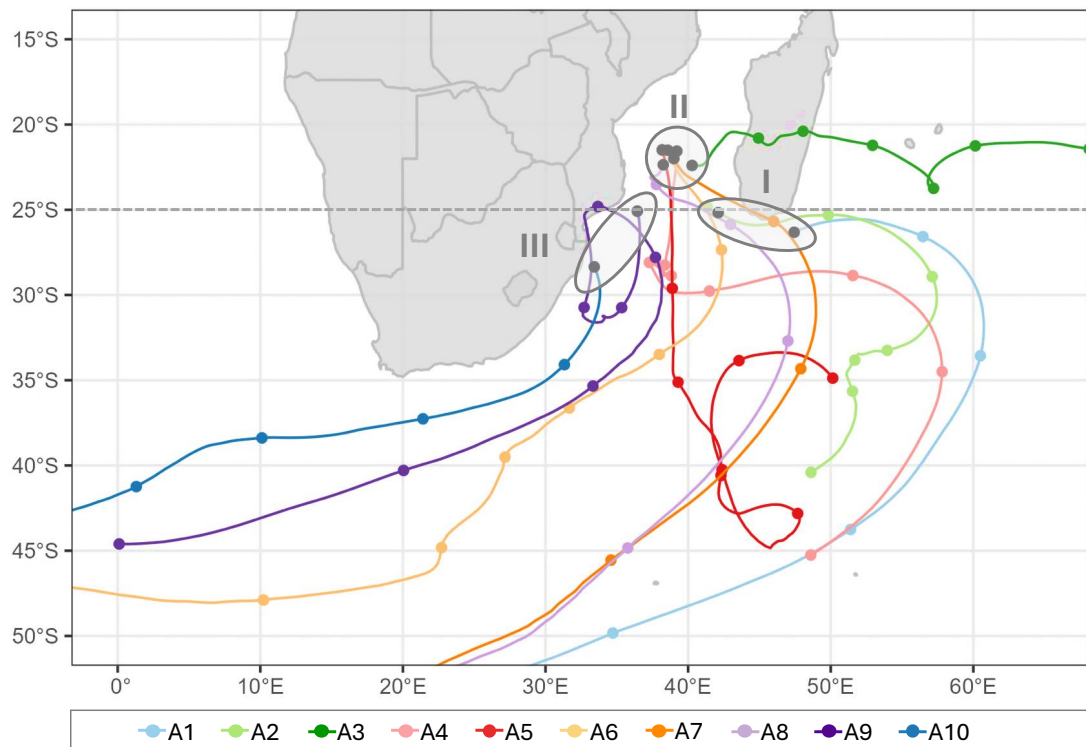

**Figure S1.** Seven days single back-trajectory analysis for prevailing air-masses at 10m height ending at the mid-sampling position of each individual aerosol sampling transect. The colour code refers to individual aerosol samples. Air-mass influence groups (I, II and III) as defined in section 3.1 are circled.

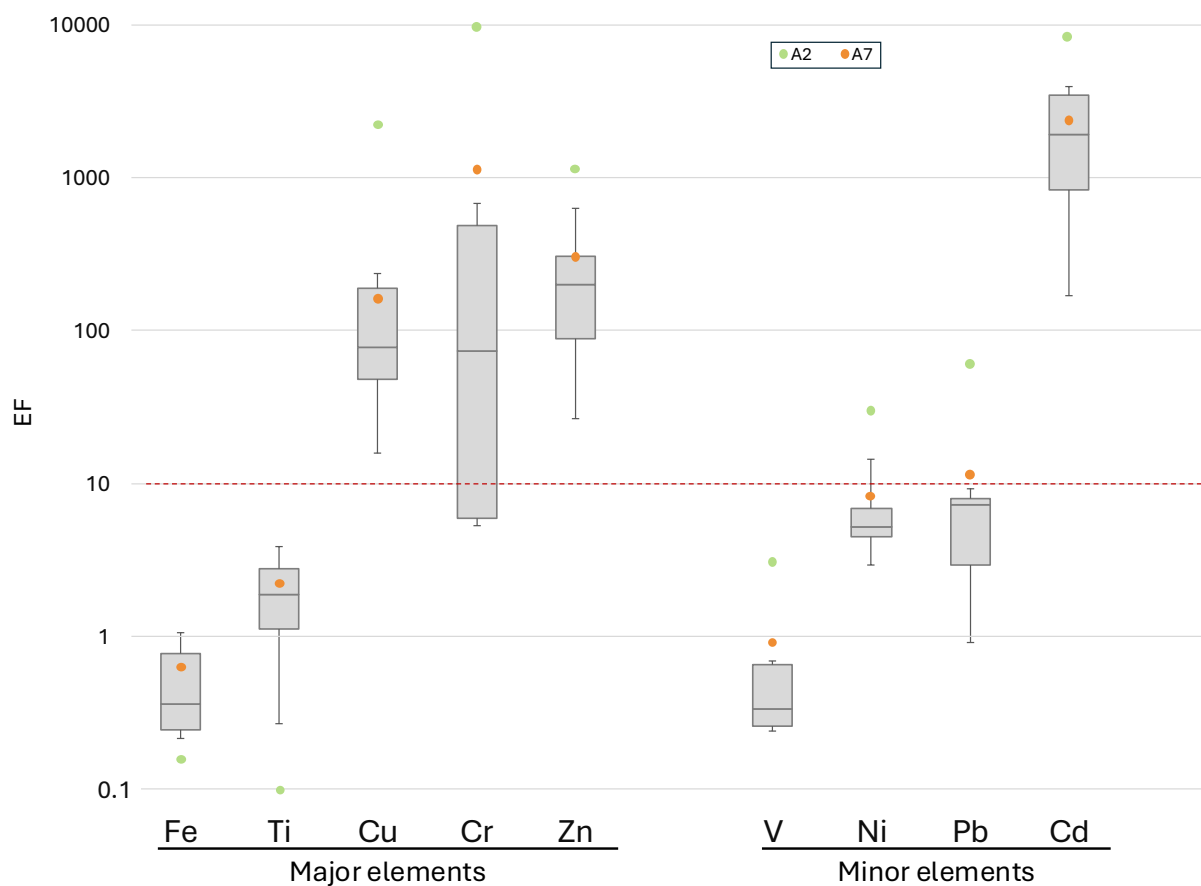

**Figure S2:** Enrichment factor calculated in aerosols collected over the southern Mozambique Channel. The horizontal lines within boxes indicate medians, boxes indicate interquartile ranges, and whiskers indicate values within 1.5 times the interquartile range from boxes. The green and orange dots indicate the EF values associated with samples A2 and A7, respectively, which have not been used to make the box and whiskers and are not used in this study (see Methods section). The dashed red line indicates the threshold value of 10 used in this study.

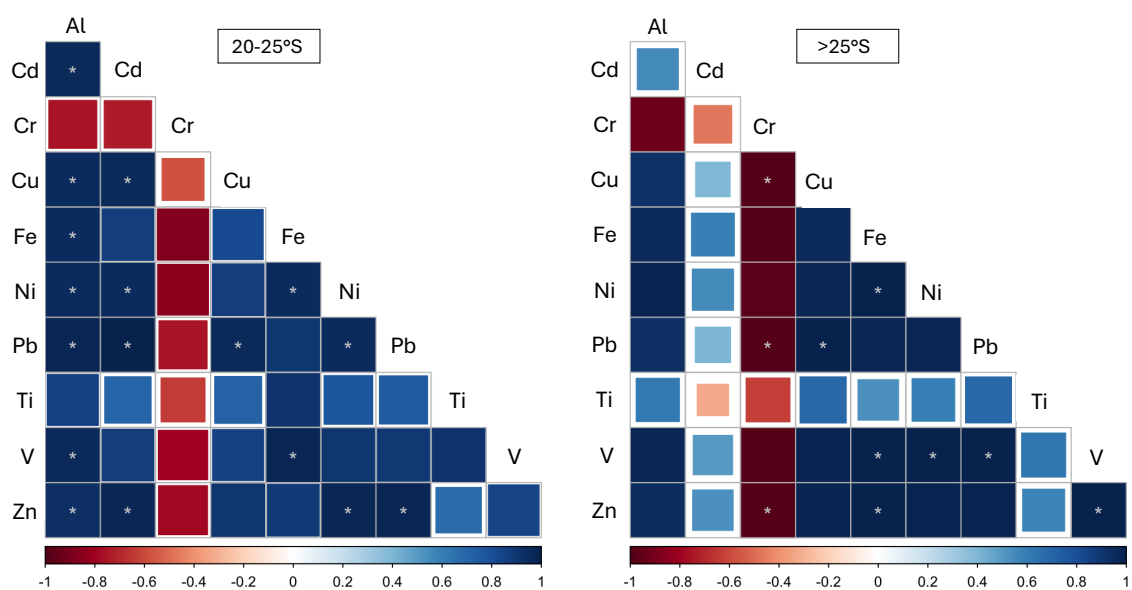

**Figure S3: Correlation heatmap between the trace element total concentrations in aerosols collected over the southern Mozambique Channel. Both the colour and size of each box indicate the degree of correlation between elements. Star symbols correspond to very strong and significant correlation ( $p$ -value<0.01). The panel on the left- and to the right-hand side correspond to samples collected at latitudes 20-25°S (sample Group II) and south to 25°S (sample Groups I and III), respectively.**
